# Supplementary material for: Effect of Sinapis alba L. as an Insectary Plant on the Occurrence of Aphis fabae Scop., Coccinellidae and Syrphidae in Broad Bean
Source: MDPI journal article supplement (doi:10.3390/agronomy11112202), 2021-10-30
Supplement: s1 [file s1]

**Table S1.** Anova results for year (Y), row spacing (RS) and thinning (T) on mean numbers of aphids, Syrphidae eggs and larvae, Coccinellidae egg clutches, larvae and adults in broad bean.

|        | df | Aphids |       | Syrphidae |       |        |       | Coccinellidae |       |        |       |        |       |
|--------|----|--------|-------|-----------|-------|--------|-------|---------------|-------|--------|-------|--------|-------|
|        |    | F      | p     | eggs      |       | larvae |       | egg clutches  |       | larvae |       | adults |       |
|        |    |        |       | F         | p     | F      | p     | F             | p     | F      | p     | F      | p     |
| Y      | 2  | 70.386 | 0.000 | 28.590    | 0.000 | 41.353 | 0.000 | 17.422        | 0.000 | 53.412 | 0.000 | 24.010 | 0.000 |
| RS     | 1  | 0.079  | 0.780 | 0.061     | 0.806 | 1.375  | 0.249 | 0.827         | 0.369 | 0.049  | 0.826 | 1.665  | 0.205 |
| T      | 1  | 0.231  | 0.633 | 0.240     | 0.627 | 1.409  | 0.243 | 0.744         | 0.394 | 6.642  | 0.014 | 13.462 | 0.001 |
| Y*RS   | 2  | 0.685  | 0.511 | 2.147     | 0.132 | 1.290  | 0.288 | 0.606         | 0.551 | 0.096  | 0.908 | 0.825  | 0.447 |
| Y*T    | 2  | 0.149  | 0.862 | 0.129     | 0.880 | 1.293  | 0.287 | 0.418         | 0.662 | 4.773  | 0.014 | 1.181  | 0.318 |
| RS*T   | 1  | 0.111  | 0.741 | 0.043     | 0.837 | 0.000  | 0.996 | 1.641         | 0.208 | 0.340  | 0.563 | 0.074  | 0.787 |
| Y*RS*T | 2  | 0.100  | 0.905 | 1.707     | 0.196 | 0.028  | 0.973 | 1.379         | 0.265 | 1.442  | 0.250 | 0.390  | 0.680 |
| Error  | 36 |        |       |           |       |        |       |               |       |        |       |        |       |

**Table S2.** Anova results for spacing (RS) and thinning (T) on mean numbers of aphids, Syrphidae eggs and larvae, Coccinellidae egg clutches, larvae and adults in broad bean in each year of study.

| 2015   |    |       |       |           |       |        |       |               |       |        |       |        |       |
|--------|----|-------|-------|-----------|-------|--------|-------|---------------|-------|--------|-------|--------|-------|
| Aphids |    |       |       | Syrphidae |       |        |       | Coccinellidae |       |        |       |        |       |
|        | df | F     | p     | eggs      |       | larvae |       | egg clutches  |       | larvae |       | adults |       |
|        |    |       |       | F         | p     | F      | p     | F             | p     | F      | p     | F      | p     |
| RS     | 1  | 0.393 | 0.543 | 4.911     | 0.047 | 0.190  | 0.671 | 0.750         | 0.403 | 0.080  | 0.783 | 0.024  | 0.880 |
| T      | 1  | 0.178 | 0.680 | 1.459     | 0.250 | 0.179  | 0.679 | 0.078         | 0.785 | 5.378  | 0.039 | 4.088  | 0.066 |
| RS*T   | 1  | 0.001 | 0.974 | 6.559     | 0.025 | 0.000  | 0.986 | 1.625         | 0.227 | 0.939  | 0.352 | 0.026  | 0.874 |
| Error  | 12 |       |       |           |       |        |       |               |       |        |       |        |       |
| 2016   |    |       |       |           |       |        |       |               |       |        |       |        |       |
| RS     | 1  | 2.163 | 0.167 | 0.399     | 0.539 | 2.718  | 0.125 | 0.002         | 0.964 | 0.088  | 0.772 | 3.808  | 0.075 |
| T      | 1  | 0.136 | 0.719 | 0.006     | 0.938 | 1.789  | 0.206 | 4.584         | 0.053 | 7.458  | 0.018 | 15.372 | 0.002 |
| RS*T   | 1  | 2.001 | 0.183 | 0.697     | 0.420 | 0.029  | 0.867 | 0.000         | 0.996 | 14.976 | 0.002 | 1.090  | 0.317 |
| Error  | 12 |       |       |           |       |        |       |               |       |        |       |        |       |
| 2017   |    |       |       |           |       |        |       |               |       |        |       |        |       |
| RS     | 1  | 0.050 | 0.827 | 16.968    | 0.001 | 9.284  | 0.010 | 2.000         | 0.183 | 2.304  | 0.155 | 20.274 | 0.001 |
| T      | 1  | 1.004 | 0.336 | 1.527     | 0.240 | 13.910 | 0.003 | 2.000         | 0.183 | 0.002  | 0.962 | 11.269 | 0.006 |
| RS*T   | 1  | 1.853 | 0.198 | 2.855     | 0.117 | 0.200  | 0.662 | 2.000         | 0.183 | 0.000  | 0.996 | 4.536  | 0.055 |
| Error  | 12 |       |       |           |       |        |       |               |       |        |       |        |       |

**Table S3.** Anova results for year (Y), row spacing (RS) and thinning (T) on the number of aphids per one predator (larva of Syrphidae or Coccinellidae, adult of Coccinellidae) in broad bean.

|        | df | Syrphidae |       | Coccinellidae |       | Coccinellidae |       |
|--------|----|-----------|-------|---------------|-------|---------------|-------|
|        |    | larva     |       | larva         |       | adult         |       |
|        |    | F         | p     | F             | p     | F             | p     |
| Y      | 2  | 35.000    | 0.000 | 24.577        | 0.000 | 20.866        | 0.000 |
| RS     | 1  | 5.411     | 0.026 | 0.406         | 0.528 | 3.180         | 0.083 |
| T      | 1  | 5.660     | 0.023 | 6.024         | 0.019 | 11.954        | 0.001 |
| Y*RS   | 2  | 3.719     | 0.034 | 22.245        | 0.000 | 5.368         | 0.009 |
| Y*T    | 2  | 10.019    | 0.000 | 18.985        | 0.000 | 5.994         | 0.006 |
| RS*T   | 1  | 5.088     | 0.030 | 0.324         | 0.572 | 1.950         | 0.171 |
| Y*RS*T | 2  | 7.159     | 0.002 | 20.765        | 0.000 | 1.970         | 0.154 |
| Error  | 36 |           |       |               |       |               |       |

**Table S4.** Anova results for spacing (RS) and thinning (T) on the number of aphids per one predator (larva of Syrphidae or Coccinellidae, adult of Coccinellidae) in broad bean in each year of study.

|       |    | Syrphidae |       | Coccinellidae |       | Coccinellidae |       |
|-------|----|-----------|-------|---------------|-------|---------------|-------|
|       |    | larva     |       | larva         |       | adult         |       |
|       | df | F         | p     | F             | p     | F             | p     |
| 2015  |    |           |       |               |       |               |       |
| RS    | 1  | 0.215     | 0.652 | 0.005         | 0.947 | 0.740         | 0.406 |
| T     | 1  | 1.817     | 0.203 | 4.559         | 0.054 | 1.411         | 0.258 |
| RS*T  | 1  | 0.144     | 0.711 | 1.650         | 0.223 | 0.000         | 0.998 |
| Error | 12 |           |       |               |       |               |       |
| 2016  |    |           |       |               |       |               |       |
| RS    | 1  | 5.551     | 0.036 | 8.486         | 0.013 | 5.758         | 0.034 |
| T     | 1  | 10.631    | 0.007 | 14.712        | 0.002 | 9.858         | 0.009 |
| RS*T  | 1  | 8.432     | 0.013 | 10.652        | 0.007 | 2.530         | 0.138 |
| Error | 12 |           |       |               |       |               |       |
| 2017  |    |           |       |               |       |               |       |
| RS    | 1  | 1.095     | 0.316 | 359.043       | 0.000 | 2.488         | 0.141 |
| T     | 1  | 19.638    | 0.001 | 133.510       | 0.000 | 7.848         | 0.016 |
| RS*T  | 1  | 4.995     | 0.045 | 244.789       | 0.000 | 0.016         | 0.901 |
| Error | 12 |           |       |               |       |               |       |

**Table S5.** Anova results for year (Y), row spacing (RS) and thinning (T) on the growth parameters and yield of broad bean.

|        |    | Mass of leaves |       | Mass of shoots |       | Mass of pods with seeds |       | Yield   |       |
|--------|----|----------------|-------|----------------|-------|-------------------------|-------|---------|-------|
|        | df | F              | p     | F              | p     | F                       | p     | F       | p     |
| Y      | 2  | 73.863         | 0.000 | 20.192         | 0.000 | 97.273                  | 0.000 | 108.714 | 0.000 |
| RS     | 1  | 49.533         | 0.000 | 10.103         | 0.003 | 3.790                   | 0.059 | 24.690  | 0.000 |
| T      | 1  | 36.310         | 0.000 | 0.615          | 0.438 | 23.646                  | 0.000 | 8.699   | 0.006 |
| Y*RS   | 2  | 0.055          | 0.946 | 0.566          | 0.573 | 7.342                   | 0.002 | 3.423   | 0.044 |
| Y*T    | 2  | 1.339          | 0.275 | 0.697          | 0.505 | 6.407                   | 0.004 | 2.514   | 0.095 |
| RS*T   | 1  | 0.161          | 0.690 | 2.792          | 0.103 | 0.259                   | 0.614 | 0.113   | 0.738 |
| Y*RS*T | 2  | 3.401          | 0.044 | 0.185          | 0.832 | 1.638                   | 0.209 | 0.793   | 0.460 |
| Error  | 36 |                |       |                |       |                         |       |         |       |

**Table S6.** Anova results for spacing (RS) and thinning (T) on the growth parameters and yield of broad bean in each year of study.

|       |    | Mass of leaves |       | Mass of shoots |       | Mass of pods with seeds |       | Yield  |       |
|-------|----|----------------|-------|----------------|-------|-------------------------|-------|--------|-------|
|       | df | F              | p     | F              | p     | F                       | p     | F      | p     |
| 2015  |    |                |       |                |       |                         |       |        |       |
| RS    | 1  | 18.055         | 0.001 | 7.299          | 0.019 | 1.549                   | 0.237 | 13.660 | 0.003 |
| T     | 1  | 10.091         | 0.008 | 0.043          | 0.839 | 0.022                   | 0.884 | 0.012  | 0.916 |
| RS*T  | 1  | 1.541          | 0.238 | 0.408          | 0.535 | 0.211                   | 0.654 | 0.021  | 0.887 |
| Error | 12 |                |       |                |       |                         |       |        |       |
| 2016  |    |                |       |                |       |                         |       |        |       |
| RS    | 1  | 15.369         | 0.002 | 0.671          | 0.429 | 23.163                  | 0.000 | 6.961  | 0.022 |
| T     | 1  | 6.685          | 0.024 | 1.184          | 0.298 | 15.789                  | 0.002 | 2.710  | 0.126 |
| RS*T  | 1  | 1.946          | 0.188 | 1.276          | 0.281 | 3.333                   | 0.093 | 1.168  | 0.301 |

|       |    |        |       |       |       |        |       |        |       |
|-------|----|--------|-------|-------|-------|--------|-------|--------|-------|
| Error | 12 |        |       |       |       |        |       |        |       |
|       |    |        |       | 2017  |       |        |       |        |       |
| RS    | 1  | 16.174 | 0.002 | 7.472 | 0.018 | 7.095  | 0.021 | 4.458  | 0.056 |
| T     | 1  | 21.297 | 0.001 | 0.100 | 0.757 | 75.531 | 0.000 | 37.984 | 0.000 |
| RS*T  | 1  | 3.384  | 0.091 | 1.478 | 0.247 | 3.471  | 0.087 | 1.667  | 0.221 |
| Error | 12 |        |       |       |       |        |       |        |       |
